# Supplementary material for: Ammonia–Mechanical Pretreatment of Wheat Straw for the Production of Lactic Acid and High-Quality Lignin
Source: MDPI journal article supplement (doi:10.3390/fermentation9020177), 2023-02-15
Supplement: s1 [file s1]

Supplementary Materials:

## Ammonia–Mechanical Pretreatment of Wheat Straw for the Production of Lactic Acid and High-Quality Lignin

Yulian Cao <sup>1,2</sup>, Haifeng Liu <sup>2</sup>, Junqiang Shan <sup>2</sup>, Baijun Sun <sup>3</sup>, Yanjun Chen <sup>2</sup>, Lei Ji <sup>2</sup>, Xingxiang Ji <sup>1</sup>, Jian Wang <sup>3</sup>, Chenjie Zhu <sup>2,\*</sup> and Hanjie Ying <sup>2</sup>

<sup>1</sup> State Key Laboratory of Biobased Material and Green Papermaking, Qilu University of Technology, Shandong Academy of Sciences, Jinan 250353, China

<sup>2</sup> College of Biotechnology and Pharmaceutical Engineering, Nanjing Tech University, Nanjing 211816, China;

<sup>3</sup> Hangzhong Dehong Technology Co.,Ltd., Hangzhou 310015, China;\_

\* Correspondence: zhucj@njtech.edu.cn; Tel.: +86-15261868731

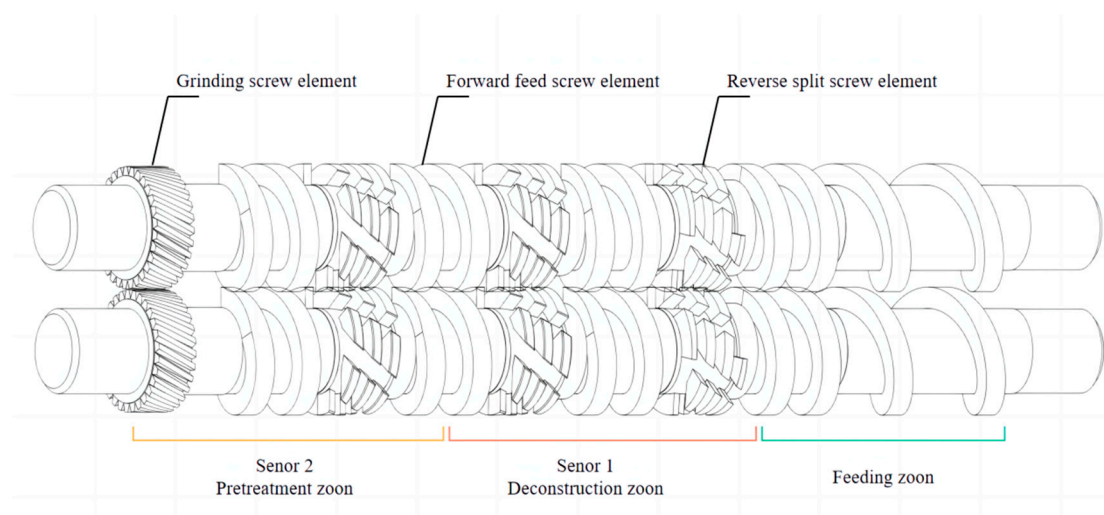

**Figure S1.** Twin-screw element structure diagram.

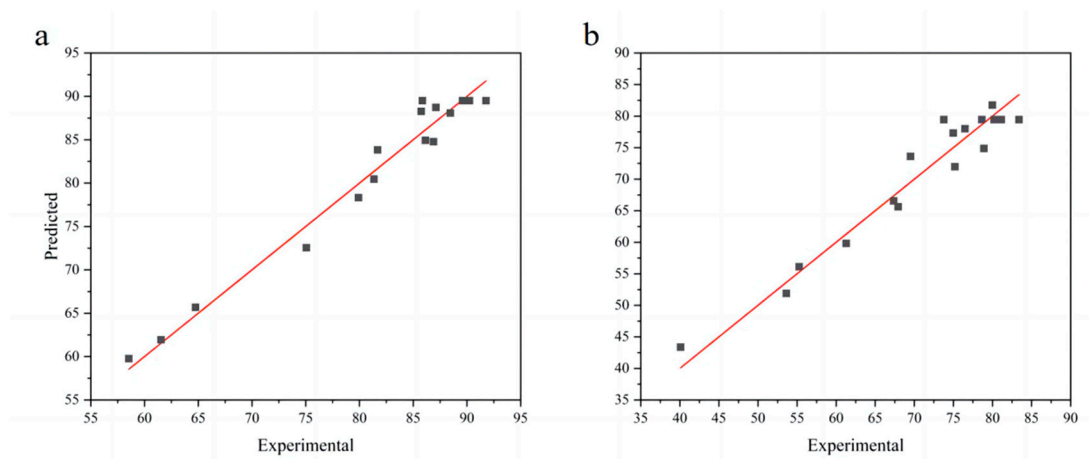

**Figure S2.** Predicted vs experimental of conversion. (a) Cellulose; (b) Hemicellulose.

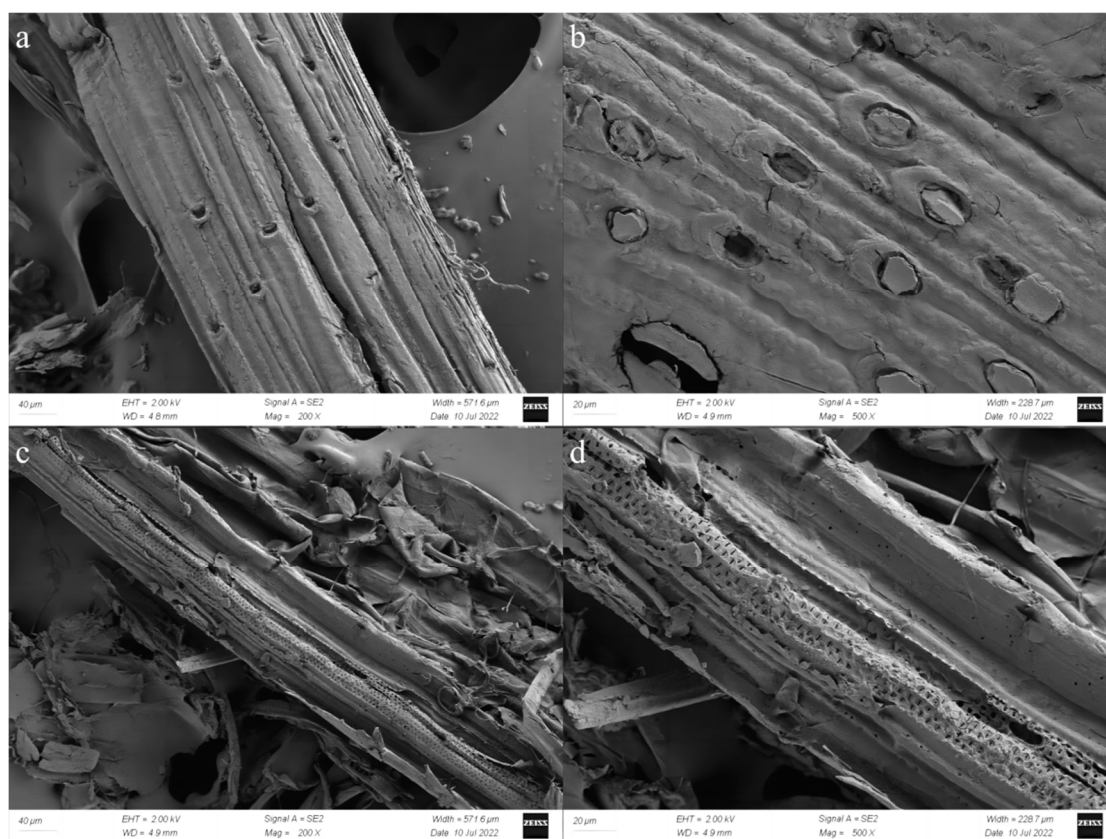

**Figure S3.** SEM micrographs of wheat straw and pretreatment residue (at optimal pretreatment conditions). (a-b) wheat straw, (c-d) pretreatment residue.

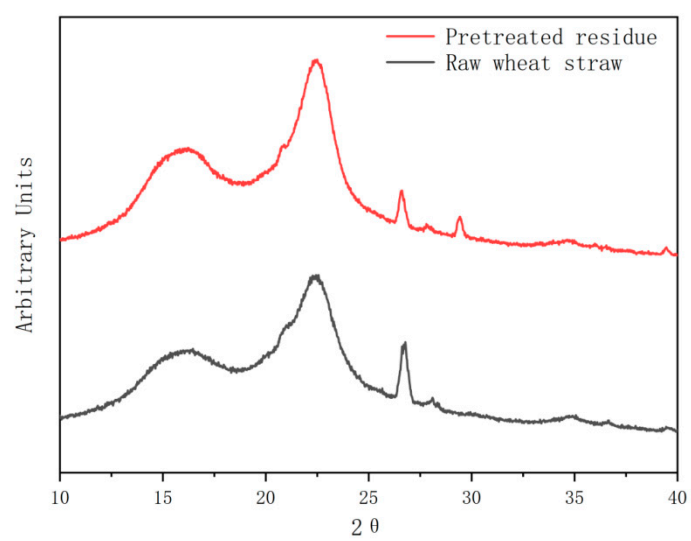

**Figure S4.** XRD of wheat straw and pretreatment residue (at optimal pretreatment conditions).

**Table S1.** Box-Behnken Design (BBD) for optimization of process parameters affecting the cellulose conversion ( $Y_{\text{Glucose}}$ ) and hemicellulose conversion ( $Y_{\text{Xylose}}$ ) during ammonia-mechanical pretreatment of wheat straw

| Entry           | $X_1^c$ | $X_2^d$ | $X_3^e$ | $Y_{\text{Cellulose-end}}\%$ |           | $Y_{\text{Hemicellulose-end}}\%$ |           |
|-----------------|---------|---------|---------|------------------------------|-----------|----------------------------------|-----------|
|                 |         |         |         | Experimental                 | Predicted | Experimental                     | Predicted |
| 1 <sup>a</sup>  | 15      | 3:1     | 6       | 87.12                        | 88.72     | 76.50                            | 77.98     |
| 2 <sup>a</sup>  | 25      | 2:1     | 6       | 88.46                        | 88.07     | 79.99                            | 81.74     |
| 3 <sup>a</sup>  | 25      | 3:1     | 4       | 86.14                        | 84.93     | 75.20                            | 71.96     |
| 4 <sup>a</sup>  | 15      | 2:1     | 4       | 91.78                        | 89.50     | 78.65                            | 79.44     |
| 5 <sup>a</sup>  | 15      | 3:1     | 2       | 81.69                        | 83.82     | 69.52                            | 73.59     |
| 6 <sup>a</sup>  | 15      | 1:1     | 2       | 79.92                        | 78.32     | 61.29                            | 59.80     |
| 7 <sup>a</sup>  | 25      | 2:1     | 2       | 81.36                        | 80.45     | 67.37                            | 66.54     |
| 8 <sup>a</sup>  | 25      | 1:1     | 4       | 85.75                        | 88.27     | 74.99                            | 77.30     |
| 9 <sup>a</sup>  | 15      | 2:1     | 4       | 85.86                        | 89.50     | 73.79                            | 79.44     |
| 10 <sup>a</sup> | 5       | 2:1     | 6       | 64.75                        | 65.67     | 55.28                            | 56.11     |
| 11 <sup>a</sup> | 5       | 3:1     | 4       | 75.06                        | 72.54     | 67.94                            | 65.62     |
| 12 <sup>a</sup> | 5       | 2:1     | 2       | 61.54                        | 61.93     | 53.64                            | 51.88     |
| 13 <sup>a</sup> | 5       | 1:1     | 4       | 58.54                        | 59.75     | 40.11                            | 43.35     |
| 14 <sup>a</sup> | 15      | 2:1     | 4       | 89.60                        | 89.50     | 80.22                            | 79.44     |
| 15 <sup>a</sup> | 15      | 2:1     | 4       | 90.24                        | 89.50     | 81.13                            | 79.44     |
| 16 <sup>a</sup> | 15      | 2:1     | 4       | 90.03                        | 89.50     | 83.40                            | 79.44     |
| 17 <sup>a</sup> | 15      | 1:1     | 6       | 86.89                        | 84.77     | 78.92                            | 74.85     |
| 18 <sup>b</sup> | 19      | 2.1:1   | 4.8     | 93.47                        | 92.45     | 82.61                            | 83.39     |

<sup>a</sup> The pretreatment residue under BBD conditions. <sup>b</sup> The pretreatment residue under the optimal condition. <sup>c</sup> Aqueous ammonia concentration ( $w/w$ ). <sup>d</sup> Liquid-solid ratio ( $w/w$ ). <sup>e</sup> Holding time (h).

The second-order polynomial model of the cellulose and hemicellulose conversion was fit with the following equation (1) and (2):

$$Y_{\text{cellulose-end}} = 4.76 + 5.08X_1 + 15.68X_2 + 9.02X_3 - 0.11X_1^2 - 1.63X_2^2 - 0.99X_3^2 - 0.40X_1X_2 + 0.05X_1X_3 - 0.19X_2X_3 \quad (1)$$

$$Y_{\text{hemicellulose-end}} = -33.66 + 5.19X_1 + 34.693X_2 + 11.40X_3 - 0.11X_1^2 - 3.69X_2^2 - 1.05X_3^2 - 0.69X_1X_2 + 0.14X_1X_3 - 1.33X_2X_3 \quad (2)$$

**Table S2.** ANOVA table of linear, quadratic and interactive terms of ammonia-mechanical pretreatment process variables on responses (F-value)

| Source                  | Cellulose conversions |                 | Hemicellulose conversion |                 |
|-------------------------|-----------------------|-----------------|--------------------------|-----------------|
|                         | F Value               | <i>p</i> -value | F Value                  | <i>p</i> -value |
| Model                   | 25.70                 | 0.0001          | 12.72                    | 0.0015          |
| A                       | 114.74                | < 0.0001        | 44.13                    | 0.0003          |
| B                       | 6.13                  | 0.0425          | 7.79                     | 0.0269          |
| C                       | 8.84                  | 0.0207          | 10.27                    | 0.0150          |
| AB                      | 8.92                  | 0.0203          | 10.37                    | 0.0146          |
| AC                      | 0.52                  | 0.4947          | 1.64                     | 0.2413          |
| BC                      | 0.081                 | 0.7838          | 1.54                     | 0.2543          |
| A <sup>2</sup>          | 76.40                 | < 0.0001        | 28.68                    | 0.0011          |
| B <sup>2</sup>          | 1.53                  | 0.2565          | 3.14                     | 0.1195          |
| C <sup>2</sup>          | 9.10                  | 0.0195          | 4.03                     | 0.0847          |
| Lack of Fit             | not significant       |                 | not significant          |                 |
| C.V.%                   | 3.32                  |                 | 6.09                     |                 |
| R <sup>2</sup>          | 0.9706                |                 | 0.9424                   |                 |
| Adjusted R <sup>2</sup> | 0.9329                |                 | 0.8683                   |                 |

**Table S3.** Composition of wheat straw enzymatic hydrolysate used for lactic acid fermentation

| Component                | Concentration (g/L) |
|--------------------------|---------------------|
| Glucose                  | 60.90               |
| Xylose                   | 25.16               |
| Cellobiose               | 0.80                |
| Arabinose                | 2.99                |
| Furfural                 | /                   |
| 5-hydroxymethyl furfural | /                   |
| Acetic acid              | /                   |
| Formic acid              | /                   |

**Table S4.** The crystallinity index of wheat straw and pretreatment residue ( at optimal pretreatment conditions)

| <b>Name</b>          | <b>I<sub>002</sub></b> | <b>I<sub>am</sub></b> | <b>CrI</b> |
|----------------------|------------------------|-----------------------|------------|
| Wheat straw          | 13848                  | 7244                  | 47.69%     |
| Pretreatment residue | 16612                  | 7713                  | 53.57%     |

**Table S5.** Ultimate analysis of MWL and P-lignin ( extracted at optimal pretreatment conditions)

| <b>Name</b> | <b>C (%)</b> | <b>H (%)</b> | <b>N (%)</b> | <b>S (%)</b> |
|-------------|--------------|--------------|--------------|--------------|
| MWL         | 57.13        | 6.235        | 0.215        | 0.08         |
| P-lignin.   | 48.735       | 6.075        | 2.755        | 0.05         |

**Table S6.** Assignment in main lignin  $^{13}\text{C}$ - $^1\text{H}$  cross-signals in the HSQC spectra

| Label                   | $\delta_{\text{C}}/\delta_{\text{H}}$ | Assignments                                                                     |
|-------------------------|---------------------------------------|---------------------------------------------------------------------------------|
| Methoxyl group          | 56.1/3.73                             | C-H in methoxyls                                                                |
| B $_{\beta}$            | 53.30/3.56                            | C $_{\beta}$ -H $_{\beta}$ in phenylcoumarane substructures (B)                 |
| B $_{\gamma}$           | 62.5/3.73                             | C $_{\gamma}$ -H $_{\gamma}$ in phenylcoumaran substructures (B)                |
| A $_{\alpha}$           | 71.6/4.88                             | C $_{\alpha}$ -H $_{\alpha}$ in $\beta$ -O-4' substructures (A)                 |
| A $_{\beta}'$ (S)       | 84.0/4.42                             | C $_{\beta}$ -H $_{\beta}$ in $\beta$ -O-4' substructures linked to S' (A)      |
| A $_{\beta}$ (S)        | 86.1/4.14                             | C $_{\beta}$ -H $_{\beta}$ in $\beta$ -O-4' substructures linked to S units (A) |
| A $_{\gamma}$           | 60.6/3.68                             | C $_{\gamma}$ -H $_{\gamma}$ in $\beta$ -O-4' substructures (A)                 |
| A' $_{\gamma}$          | 62.4/4.13                             | C $_{\gamma}$ -H $_{\gamma}$ in $\gamma$ -acylated $\beta$ -O-4' (A)            |
| T $_{2,6}$              | 104.1/7.45                            | C $_{2,6}$ -H $_{2,6}$ in T units (T)                                           |
| T $_6$                  | 99.1/6.23                             | C $_6$ -H $_6$ in T units (T)                                                   |
| T $_8$                  | 94.5/6.59                             | C $_8$ -H $_8$ in T units (T)                                                   |
| T $_3$                  | 104.8/7.05                            | C $_3$ -H $_3$ in T units (T)                                                   |
| S $_{2,6}$              | 104.3/6.71                            | C $_{2,6}$ -H $_{2,6}$ in etherified syringyl units (S)                         |
| G $_2$                  | 110.7/6.96                            | C $_2$ -H $_2$ in guaiacyl units (G)                                            |
| G $_5$                  | 115.4/6.79                            | C $_5$ -H $_5$ in guaiacyl units (G)                                            |
| G $_6$                  | 119.2/6.78                            | C $_6$ -H $_6$ in guaiacyl units (G)                                            |
| H $_{2,6}$              | 128.4/7.23                            | C $_{2,6}$ -H $_{2,6}$ in H units (H)                                           |
| FA $_2$                 | 111.6/7.33                            | C $_2$ -H $_2$ in ferulic acid (FA)                                             |
| FA $_{\beta}$           | 115.5/6.53                            | C $_{\beta}$ -H $_{\beta}$ in ferulic acid (FA)                                 |
| FA $_{\alpha}$          | 145.2/7.58                            | C $_{\alpha}$ -H $_{\alpha}$ in ferulic acid (FA)                               |
| FAM $_2$                | 111.3/7.32                            | C $_2$ -H $_2$ in feruloyl amide (FAM)                                          |
| FAM $_6$                | 120.9/7.07                            | C $_6$ -H $_6$ in feruloyl amide (FAM)                                          |
| <i>p</i> CA $_{\beta}$  | 114.0/6.29                            | C $_{\beta}$ -H $_{\beta}$ in <i>p</i> -coumaric acid ( <i>p</i> CA)            |
| <i>p</i> CA $_{\alpha}$ | 144.8/7.26                            | C $_{\alpha}$ -H $_{\alpha}$ in <i>p</i> -coumaric acid ( <i>p</i> CA)          |
| <i>p</i> CA $_{3,5}$    | 115.4/6.75                            | C $_{3,5}$ -H $_{3,5}$ in <i>p</i> -coumaric acid ( <i>p</i> CA)                |
| <i>p</i> CA $_{2,6}$    | 130.3/7.47                            | C $_{2,6}$ -H $_{2,6}$ in <i>p</i> -coumaric acid ( <i>p</i> CA)                |
| <i>p</i> CAM $_{3,5}$   | 115.1/6.89                            | C $_{3,5}$ -H $_{3,5}$ in <i>p</i> -coumaroyl amide ( <i>p</i> CAM)             |
| <i>p</i> CAM $_{2,6}$   | 128.4/7.26                            | C $_{2,6}$ -H $_{2,6}$ in <i>p</i> -coumaroyl amide ( <i>p</i> CAM)             |
